# Supplementary material for: Formation and aging of secondary organic aerosol from toluene: changes in chemical composition, volatility, and hygroscopicity
Source: Copernicus journal article supplement (doi:10.5194/acp-15-8301-2015), 2015-07-24
Supplement: Supplementary file 1 [file acp-15-8301-2015-supplement.pdf]

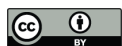

*Supplement of*

## **Formation and aging of secondary organic aerosol from toluene: changes in chemical composition, volatility, and hygroscopicity**

**L. Hildebrandt Ruiz et al.**

*Correspondence to:* L. Hildebrandt Ruiz (lhr@che.utexas.edu)

The copyright of individual parts of the supplement might differ from the CC-BY 3.0 licence.

## 1 **S1 Modification of Standard Fragmentation Table**

2 Several adjustments were made to the standard fragmentation table (Allan et al., 2004) for the  
3 analysis of HR and UMR data. Most importantly, a significant adjustment was made to the  
4 treatment of water fragmentation (Section S1.2) and to the fraction of observed H<sub>2</sub>O attributed to  
5 organics (Section S1.3).

### 7 **S1.1 Air Fragmentation**

8 The fragmentation pattern of air at  $m/z$  44 (CO<sub>2</sub><sup>+</sup>),  $m/z$  29 (N<sup>15</sup>N<sup>+</sup>),  $m/z$  18 (H<sub>2</sub>O<sup>+</sup>) and  $m/z$  16  
9 (O<sup>+</sup>) was calculated using difference spectra (signal – background) at UMR during filter  
10 measurements, which were taken at the beginning (before aerosol formation) and at the end of  
11 every experiment. H<sub>2</sub>O<sup>+</sup>, N<sup>15</sup>N<sup>+</sup> and CO<sub>2</sub><sup>+</sup> were calculated as constant fractions of the N<sub>2</sub><sup>+</sup> signal  
12 at  $m/z$  28. O<sup>+</sup> was calculated as a constant fraction of N<sup>+</sup>. When the fractions were different at the  
13 beginning and end of the experiments, a linear function was used to approximate the time-  
14 dependent fraction throughout the experiment. In all cases the calculated fractions did not differ  
15 greatly from the standard values.

### 17 **S1.2 Water Fragmentation**

18 Water dominates the signal in the background (closed) spectrum at  $m/z$  16 (O<sup>+</sup>),  $m/z$  17 (HO<sup>+</sup>)  
19 and  $m/z$  18 (H<sub>2</sub>O<sup>+</sup>). It is standard practice to determine the water fragmentation pattern from  
20 linear regressions to the closed signal of  $m/z$  16 vs.  $m/z$  18 and  $m/z$  17 vs.  $m/z$  18. In this way the  
21 O<sup>+</sup>/H<sub>2</sub>O<sup>+</sup> and HO<sup>+</sup>/H<sub>2</sub>O<sup>+</sup> ratios were determined for each experiment; the values, summarized in  
22 Table S1, differ slightly from the default values of 4% and 25% for O<sup>+</sup>/H<sub>2</sub>O<sup>+</sup> and HO<sup>+</sup>/H<sub>2</sub>O<sup>+</sup>,  
23 respectively. However, this treatment of water fragmentation does not account for the H-atoms  
24 which were bound to HO<sup>+</sup> and O<sup>+</sup> before fragmentation. Therefore, H was added to the standard  
25 fragmentation table to obtain an H:O ratio of 2 in the total signal of H<sub>2</sub>O determined by AMS  
26 data analysis (Canagaratna et al., 2015). This addition of H is made in three locations in the  
27 fragmentation table (water, organics and sulfate) because observed particle-phase H<sub>2</sub>O is divided  
28 between these species. The resulting changes in mass of water, organics and sulfate are low due  
29 to the low atomic weight of H. But, the addition of H changes the organic H:C ratio calculated in

1 elemental analysis of the organic aerosol (OA) and therefore the average carbon oxidation state  
2 ( $OS_c$ ) estimated from O:C and H:C ratios ( $OS_c \sim 2 \times O:C - H:C$ ) (Kroll et al., 2011).

3

### 4 **S1.3 Organic Fragmentation**

5 Important changes were also made to the organic fragmentation table. Based on the  
6 recommendation by Aiken et al. (2008), the following fragmentation pattern should be used  
7 relative to the  $m/z$  44 (or  $CO_2^+$  for HR analysis) signal:  $m/z$  28 ( $CO^+$ ) = 100%,  $m/z$  18 ( $H_2O^+$ ) =  
8 22.5%. Since the experiments presented here contained isotopically labeled species, organic  
9  $H_2O^+$  was instead set as a function of the ( $^{13}CO_2^+ + CO_2^+$ ) signal. When using 22.5%, the mass  
10 attributed to particulate water correlated with organic mass during the experiment, which is  
11 unexpected in these dry experiments (RH was less than 10%). There may be some water in the  
12 particles if the ammonium sulfate seed particles were not dried completely; however, the  
13 particle-phase water signal should not correlate with total organic signal. Thus, the ratio of  
14 organic  $H_2O^+$  to  $^{13}CO_2^+ + CO_2^+$  was chosen so that the mass of water does not correlate with the  
15 mass of organics ( $R < 0.01$ ). The ratios of organic  $H_2O^+$  to ( $^{13}CO_2^+ + CO_2^+$ ) are provided in  
16 Table 2 and ranged from 0.3 to 2.4, higher than the ratio of 0.225 in the default fragmentation  
17 table. Calibration experiments suggest that polyacids, diacids and multifunctional organic  
18 molecules have  $H_2O^+/CO_2^+$  ratios of 1, 2 and 0.5-1.5, respectively when analyzed with the AMS,  
19 and polyols have  $H_2O^+/CO_2^+$  exceeding 10 (Canagaratna et al., 2015). Thus, the observation of  
20 high  $H_2O^+/CO_2^+$  in these experiments may point to an importance of these functional groups in  
21 the OA produced. Increasing the amount of organic  $H_2O$  significantly increased organic mass as  
22 well as O:C in these experiments; it does not increase the approximated oxidation state.

23 A relative ionization efficiency (RIE) of 2.0 was used for all  $H_2O$  including the organic  $H_2O$ .  
24 This RIE is the ionization efficiency which has been determined for  $H_2O$  (Mensah et al., 2011)  
25 and is correct to use for the  $H_2O$  fragments from dehydration of organics if and only if  $H_2O$   
26 ionizes after fragmentation. If the organic molecule is ionized and then dehydrates and results in  
27  $H_2O^+$ , an RIE of 1.4 should be used (the RIE of organics). The only place where this uncertainty  
28 (whether fragmentation follows or precedes ionization) affects the presented results is in the  
29 calculated ratios of  $H_2O^+/(^{13}CO_2^+ + CO_2^+)$  presented in Table 2; these ratios would be higher by a  
30 factor of (2.0/1.4) if dehydration follows ionization. The ratio of  $^{13}CO^+$  to  $^{13}CO_2^+$  was close to 1

1 throughout the experiments (Table 2 in main manuscript), so the ratio  $\text{CO}^+/\text{CO}_2^+ = 1$  from the  
2 standard fragmentation table was used.

### 3 **S1.4 Treatment of $\text{NO}^+$ and $\text{NO}_2^+$**

4 In these experiments, no inorganic nitrate is introduced or anticipated. Hence the ions assigned to  
5 the nitrate family in the HR analysis ( $\text{NO}^+$ ,  $\text{NO}_2^+$ ) are presumed to be due to organic nitrates and  
6 were added to the total organic aerosol mass in the HR batch table. The relative ionization  
7 efficiency (RIE) of 1.0 is used to quantify the contribution from these fragments. The elemental  
8 analysis examines the oxidation state of the carbon atoms; hence, nitrate fragments ( $\text{NO}^+$ ,  $\text{NO}_2^+$ )  
9 were **not** included in the calculation of O:C and H:C.

10

## 11 **S2 Quantification of AMS Data**

### 12 **S2.1 Ionization efficiency, airbeam and V vs W modes**

13 Data were corrected for changes in the instrument airbeam (AB) over the course of an  
14 experiment. The ionization efficiency (IE) for each experiment was adjusted based on the ratio of  
15 the AB during the experiment to the AB during the ionization efficiency calibration conducted  
16 before this set of experiments was started (calibration  $\text{IE}/\text{AB} = 4.65 \times 10^{-13}$ ). Data were corrected  
17 for changes in the instrument airbeam (AB) over the course of an experiment. The ionization  
18 efficiency (IE) for each experiment was adjusted based on the ratio of the AB during the  
19 experiment to the AB during the ionization efficiency calibration conducted before this set of  
20 experiments was started (calibration  $\text{IE}/\text{AB} = 4.65 \times 10^{-13}$ ). Total aerosol concentrations were  
21 calculated in the following way to exploit the higher sensitivity (and accuracy) in V-mode and  
22 the higher resolution in W-mode. First, UMR fragmentation and batch tables were used to obtain  
23 bulk concentration data for sulfate in V and W mode. The V/W ratio was then computed for  
24 sulfate, obtaining a measure of the difference in total concentrations measured in these two  
25 modes. Second, HR analysis and the HR fragmentation and batch tables were used to obtain  
26 organic and sulfate concentrations in W-mode. The W-mode HR data were then multiplied by  
27 the (V/W) ratio (from UMR analysis) to obtain the most quantitative estimate of the amount of  
28 organic and sulfate mass detected by the AMS. Because all sulfate in these experiments is from  
29 the ammonium sulfate seed particles, sulfate mass was multiplied by 1.375 to obtain ammonium

1 sulfate mass. Using the V/W ratio as a correction factor indirectly applies an AB correction in  
2 W-mode. When sulfate data were not available, nitrate concentrations in V and W mode were  
3 used instead to compute the V/W ratio. The AB and V/W ratio used to correct the data in each  
4 experiment are shown in Table S1.

## 5 **S2.2 Determination of collection efficiency**

6 A further issue with all AMS analysis is that the AMS does not detect all sampled particles,  
7 primarily due to particle bounce at the vaporizer. The AMS collection efficiency (CE) for these  
8 data was estimated by matching AMS mass distributions and SMPS volume distributions using  
9 the OA density ( $\rho_{\text{org}}$ ) and AMS CE as fitting parameters, with the algorithm developed by  
10 Kostenidou et al. (2007) . Particle time of flight (pToF) distributions of organics and sulfate  
11 ( $\text{SO}_4^{2-}$ ) from V-mode were used but scaled by the adjusted HR aerosol masses (from MS mode)  
12 obtained as described above. The pToF distributions were smoothed before fitting using a 19-  
13 point, 2nd order Savitzky-Golay smoothing.

14 The data from each experiment were split according to whether the OA had been passed through  
15 the bypass or the TD to observe whether the denuded OA had a different CE and/or density  
16 compared to the total OA. The data from Expt. 9 were further split into a total of 16 periods to  
17 explore variation in CE and OA density over the course of an experiment (e.g. with increasing  
18 OH exposure of the OA or different denuder temperatures). As can be seen in Fig S1, the CE and  
19 OA density did not change significantly over the course of an experiment. There is also very  
20 little difference in CE between the OA passed through the bypass or the thermodenuder (Table  
21 S1, all experiments). As observed earlier (Lee et al., 2010) the algorithm for estimating AMS CE  
22 and OA density is much less sensitive to the OA density than to the AMS CE, and the estimated  
23 CE essentially remains the same after fixing the OA density at  $1.5 \text{ g cm}^{-3}$  (Fig S1). The values of  
24 CE are used to correct OA concentrations for the calculation of OA mass yield and mass fraction  
25 remaining. The values of OA density shown in Table S1 are used to convert aerodynamic to  
26 mobility diameter for CCN analysis.

27

28

## 1 **References:**

- 2 Aiken, A. C., DeCarlo, P. F., Kroll, J. H., Worsnop, D. R., Huffman, J. A.,  
3 Docherty, K., Ulbrich, I. M., Mohr, C., Kimmel, J. R., Sueper, D., Sun, Y., Zhang,  
4 Q., Trimborn, A. M., Northway, M. J., Ziemann, P. J., Canagaratna, M. R., Alfarra,  
5 M. R., Prevot, A. S. H., Dommen, J., Duplissy, J., Metzger, A., Baltensperger, U.  
6 and Jimenez, J. L.: O/C and OM/OC Ratios of Primary, Secondary, and Ambient  
7 Organic Aerosols with High Resolution Time-of-Flight Aerosol Mass  
8 Spectrometry, *Environ. Sci. Technol.*, 42, 4478–4485, 2008.
- 9 Allan, J. D., Delia, A. E., Coe, H., Bower, K. N., Alfarra, M. R., Jimenez, J. L.,  
10 Middlebrook, A. M., Drewnick, F., Onasch, T. B., Canagaratna, M. R., Jayne, J. T.  
11 and Worsnop, D. R.: A generalised method for the extraction of chemically  
12 resolved mass spectra from Aerodyne aerosol mass spectrometer data, *J. Aerosol*  
13 *Sci.*, 35(7), 909–922, doi:10.1016/j.jaerosci.2004.02.007, 2004.
- 14 Canagaratna, M. R., Jimenez, J.-L., Kroll, J. H., Chen, Q., Kessler, S. H., Massoli,  
15 P., Hildebrandt Ruiz, L., Fortner, E., Williams, L., Wilson, K., Surratt, J. D.,  
16 Donahue, N. M., Jayne, J. T. and Worsnop, D. R.: Elemental Ratio Measurements  
17 of Organic Compounds using Aerosol Mass Spectrometry: Characterization,  
18 Improved Calibration, and Implications, *Atmos. Chem. Phys.*, 15, 253–272, 2015.
- 19 Kostenidou, E., Pathak, R. K. and Pandis, S. N.: An Algorithm for the Calculation  
20 of Secondary Organic Aerosol Density Combining AMS and SMPS Data, *Aerosol*  
21 *Sci. Technol.*, 41(11), 1002–1010, doi:10.1080/02786820701666270, 2007.
- 22 Kroll, J. H., Donahue, N. M., Jimenez, J. L., Kessler, S. H., Canagaratna, M. R.,  
23 Wilson, K. R., Altieri, K. E., Mazzoleni, L. R., Wozniak, A. S., Bluhm, H., Mysak,  
24 E. R., Smith, J. D., Kolb, C. E. and Worsnop, D. R.: Carbon oxidation state as a  
25 metric for describing the chemistry of atmospheric organic aerosol, *Nat. Chem.*, 3,  
26 133–139, 2011.
- 27 Lee, B.-H., Hildebrandt, L., Kostenidou, E., Riipinen, I., Engelhart, G. J.,  
28 Donahue, N. M. and Pandis, S. N.: Volatility of organic aerosol sampled during  
29 FAME-2008, *Atmos. Chem. Phys.*, 10, 12149–12160, 2010.
- 30 Mensah, A. a., Buchholz, A., Mentel, T. F., Tillmann, R. and Kiendler-Scharr, A.:  
31 Aerosol mass spectrometric measurements of stable crystal hydrates of oxalates  
32 and inferred relative ionization efficiency of water, *J. Aerosol Sci.*, 42(1), 11–19,  
33 doi:10.1016/j.jaerosci.2010.10.003, 2011.

1

2 Table S1. Details on AMS data analysis

| Expt # | O/H <sub>2</sub> O | HO/H <sub>2</sub> O | AB ( $\times 10^5$ ) | Org < 106 ratio | v/w   | CE <sub>BP</sub> | CE <sub>TD</sub> | $\rho_{\text{org,BP}}$ | $\rho_{\text{org,TD}}$ |
|--------|--------------------|---------------------|----------------------|-----------------|-------|------------------|------------------|------------------------|------------------------|
| 1      | 0.027              | 0.229               | 5.28                 | 0.966           | 0.427 | 0.20             | 0.20             | 1.275                  | 1.400                  |
| 2      | 0.017              | 0.232               | 5.36                 | 0.977           | 0.478 | 0.35             | 0.30             | 1.350                  | 1.400                  |
| 3      | 0.028              | 0.223               | 5.33                 | 0.959           | 0.466 | 0.25             | 0.25             | 1.375                  | 1.425                  |
| 4      | 0.020              | 0.238               | 5.48                 | 0.970           | 0.490 | 0.25             | 0.25             | 1.350                  | 1.450                  |
| 5      | 0.016              | 0.234               | 5.04                 | 0.959           | 0.504 | 0.30             | 0.30             | 1.325                  | 1.375                  |
| 6      | 0.042              | 0.238               | 5.09                 | 0.961           | 0.531 | 0.25             | 0.25             | 1.275                  | 1.375                  |
| 7      | 0.036              | 0.269               | 4.84                 | 0.971           | 0.490 | 0.25             | 0.25             | 1.375                  | 1.475                  |
| 8      | 0.037              | 0.227               | 4.80                 | 0.968           | 0.504 | 0.20             | 0.20             | 1.325                  | 1.400                  |
| 9      | 0.022              | 0.234               | 5.05                 | 0.974           | 0.705 | 0.40             | 0.35             | 1.425                  | 1.400                  |

3

4

5

6 Table S2. Evaporation model inputs for each experiment

7

| Expt. | Diameter <sup>a</sup> (nm) | Concentration <sup>b</sup> ( $\mu\text{g m}^{-3}$ ) | OA Density ( $\text{kg m}^{-3}$ ) |
|-------|----------------------------|-----------------------------------------------------|-----------------------------------|
| 1     | 298                        | 42.8                                                | 1.28                              |
| 2     | 234                        | 6.4                                                 | 1.35                              |
| 3     | 275                        | 51.4                                                | 1.38                              |
| 4     | 228                        | 26.0                                                | 1.35                              |
| 5     | 234                        | 11.8                                                | 1.33                              |
| 6     | 243                        | 94.4                                                | 1.28                              |
| 7     | 285                        | 41.5                                                | 1.38                              |
| 8     | 266                        | 30.1                                                | 1.33                              |
| 9     | 251                        | 22.8                                                | 1.43                              |

8

<sup>a</sup>Average volumetric mode diameter of the bypass line.

9

<sup>b</sup>Average CE corrected concentration of the bypass line .

10

11

1 **Tables S3 and S4: Enthalpy of Vaporization and Accommodation Coefficient Sensitivity**  
 2 **Analysis**

3 Table S3. Normalized shifting factors for all tested values of  $\Delta H_{\text{vap}}$

| Normalized Shifting Factors |                                         |                                         |                                          |
|-----------------------------|-----------------------------------------|-----------------------------------------|------------------------------------------|
| Expt                        | $\Delta H_{\text{vap}} = 20 \text{ kJ}$ | $\Delta H_{\text{vap}} = 80 \text{ kJ}$ | $\Delta H_{\text{vap}} = 120 \text{ kJ}$ |
| 1                           | 0.36                                    | 0.31                                    | 0.29                                     |
| 2                           | 0.08                                    | 0.04                                    | 0.01                                     |
| 3                           | 0.57                                    | 0.31                                    | 0.16*                                    |
| 4                           | 0.50                                    | 0.25                                    | 0.27*                                    |
| 5                           | 0.74*                                   | 0.52                                    | 0.57                                     |
| 6                           | 0.93                                    | 0.53                                    | 0.61*                                    |
| 7                           | 1.0                                     | 1.00                                    | 1.00*                                    |
| 8                           | 0.38*                                   | 0.23                                    | 0.13                                     |
| 9                           | 0.22*                                   | 0.14                                    | 0.07                                     |

4 \* The sum of squared residuals exceeding 0.10  
 5

6 Table S4. Shifting factors and SSR values for the most volatile (Expt. 7) and least volatile (Expt.  
 7 9) experiments in our dataset estimated using different values of accommodation coefficient.

| $\alpha_m$ | Shifting Factors |        |                            | Sum of the Squared Residuals |        |
|------------|------------------|--------|----------------------------|------------------------------|--------|
|            | Expt 7           | Expt 9 | Ratio<br>(Expt 7 / Expt 9) | Expt 7                       | Expt 9 |
| 0.01       | 1.95             | 0.32   | 6.14                       | 0.09                         | 0.079  |
| 0.1        | 0.21             | 0.03   | 6.24                       | 0.09                         | 0.078  |
| 1.0        | 0.04             | 0.006  | 7.04                       | 0.10                         | 0.075  |

8

9



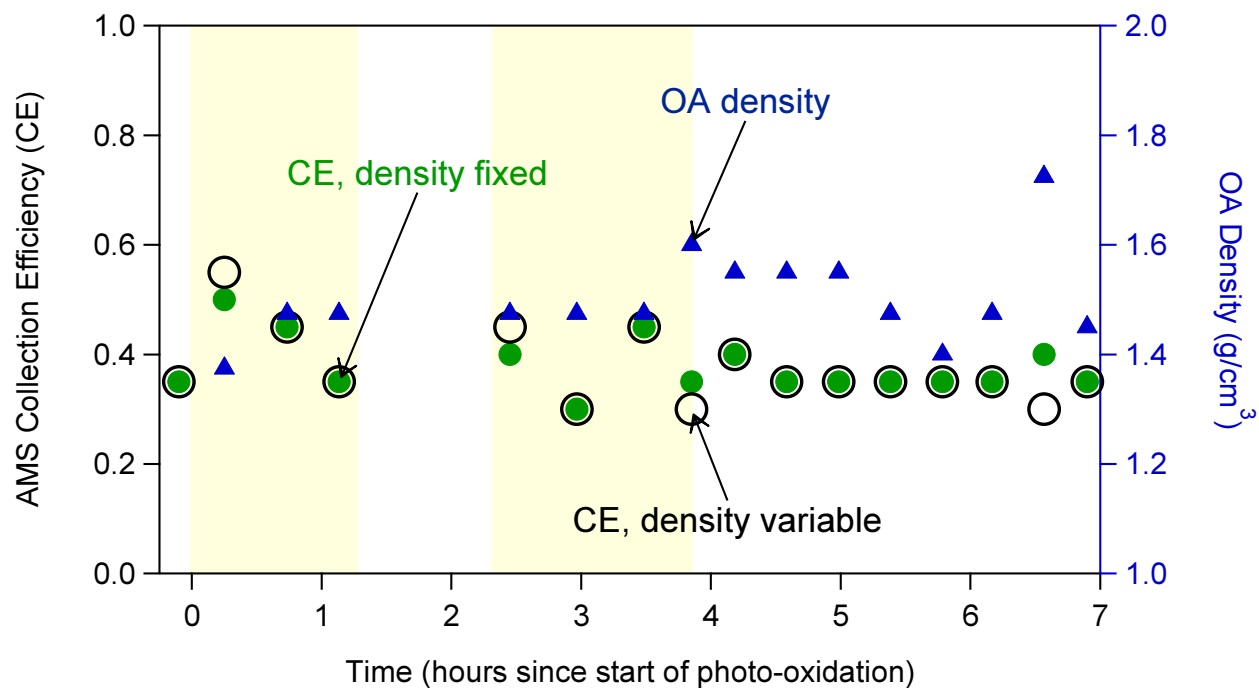

1  
 2 **Figure S1.** Estimated CE (solid green and open black circles) and OA density did not change  
 3 much over the course of an experiment (shown here are the data for Expt. 9). The algorithm used  
 4 is not as sensitive to OA density, and fixing the density at  $1.5 \text{ g cm}^{-3}$  changes the CE values only  
 5 slightly for some, and not at all for other time periods.  
 6

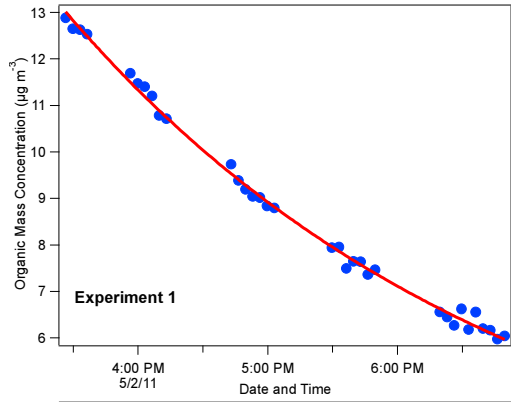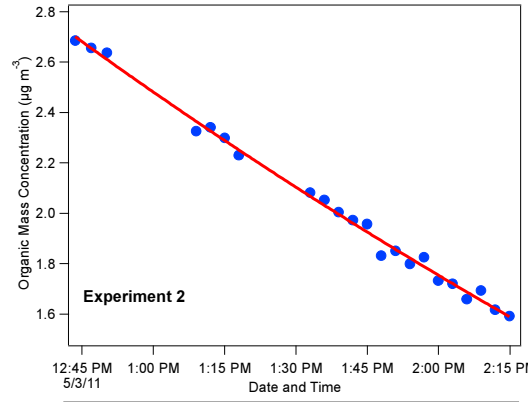

1

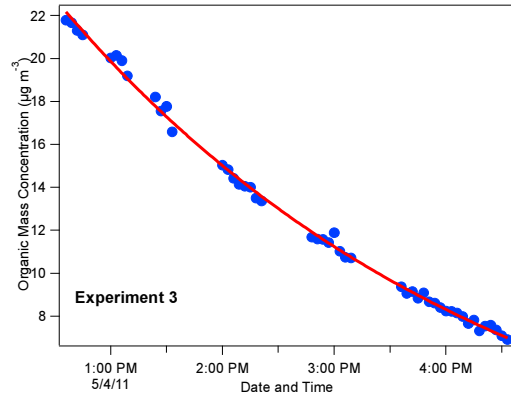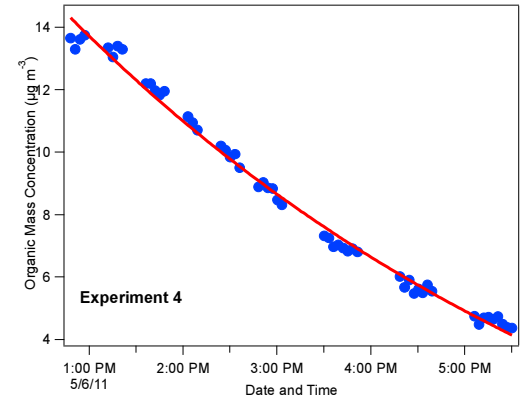

2

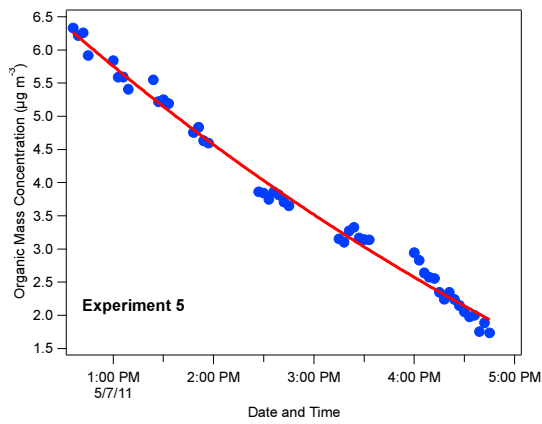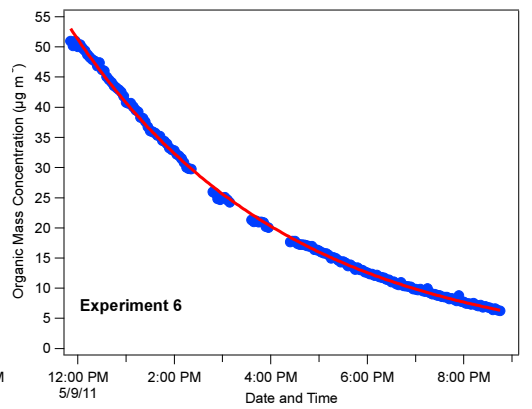

3

1

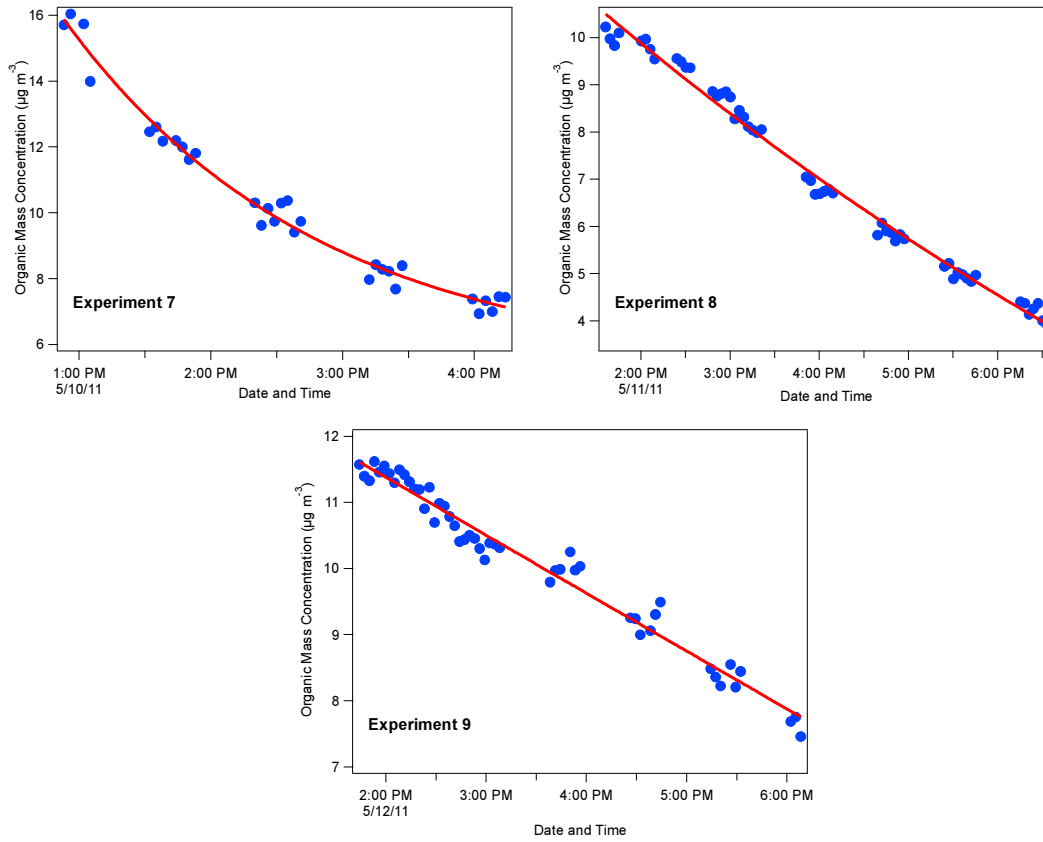

2  
3

4 **Figure S2.** The interpolated fits to the bypass data are shown for each experiment. The blue  
5 circles represent the measured organic mass concentration from the bypass line and the red lines  
6 represent the interpolated fit, normally an exponential decay.

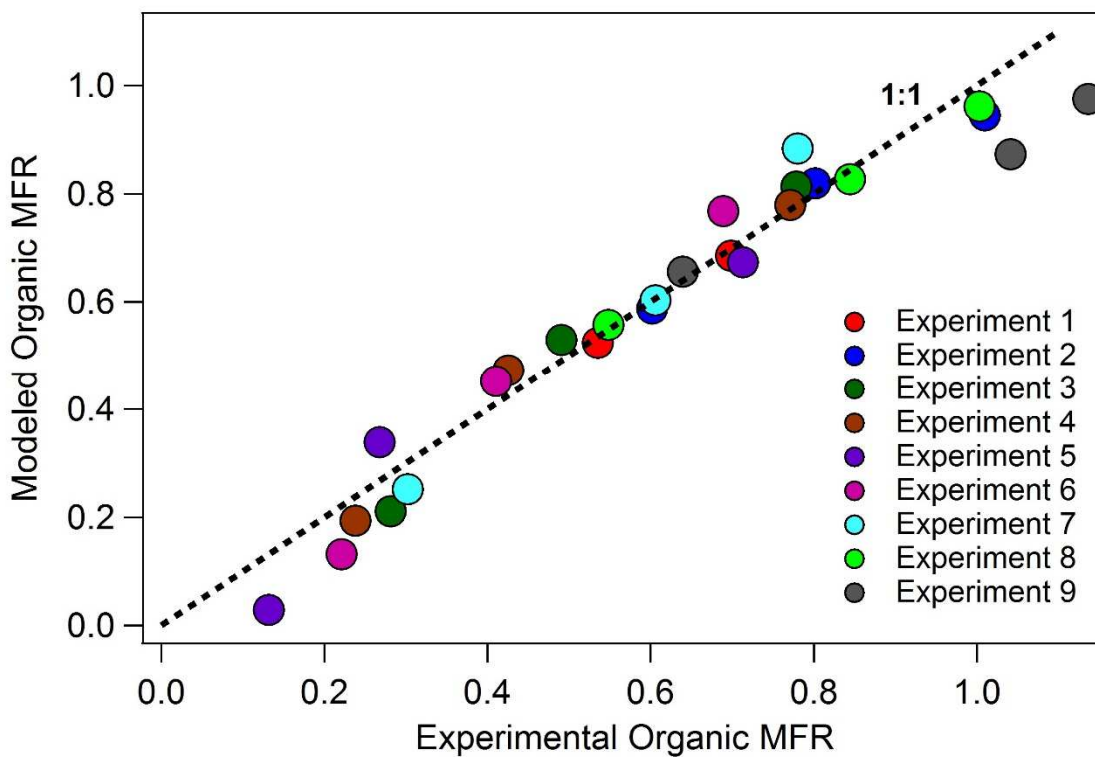

1  
 2 **Figure S3.** Comparison of the predicted MFRs based on the best fits and the experimental values  
 3 at 15 s for all temperatures for all experiments.  
 4
